# Supplementary material
Source: publisher figshare collection journal article supplement (https://acs.figshare.com/ndownloader/files/3879052)
Supplement: Supplementary file 1 [file 3879052]

# Supporting Information - Source apportionment using radiocarbon and organic tracers for PM<sub>2.5</sub> carbonaceous aerosols in Guangzhou, South China: Contrasting local and regional scale haze events

Junwen Liu, Jun Li, Yanlin Zhang, Di Liu, Ping Ding, Chengde Shen, Kaijun Shen, Quanfu He, Xiang Ding, Xinming Wang, Duohong Chen, Sönke Szidat, Gan Zhang

**Total Pages** -7  
**Tables** -2  
**Figures** -2

## **Contents:**

**Table S1:** Investigation of dynamics of WSOC desorption

**Table S2:** Emission inventory of Man/Gal, Lev/Man and (OC/Lev)<sub>bb</sub> for different types of biomass burning

**Figure S1:** Correlations between SOA tracers and WSOC<sub>f</sub> and OC<sub>bio</sub>

**Figure S2:** Correlation between WSOC<sub>f</sub> and EC<sub>f</sub>

## 1 **WIOC and EC measurement**

2 The filter was dried in a desiccator and a punch (1.5 cm × 1.0 cm) of this filter was taken for the  
3 measurements of WIOC and EC using the thermal-optical transmittance (TOT) method (NIOSH  
4 870) by an OC/EC analyzer (Sunset Laboratory Inc., Tigard, OR, U.S.).

## 5 **Water-soluble ion, anhydrosugars and SOA tracer measurement**

6 In brief, a round punch (1 inch in diameter) was extracted in ultra-pure water (10 mL), sonicated  
7 in an ice-water bath, filtered through a 0.22 μm size filter and then analyzed with an Ion  
8 Chromatography (Metrohm 883 Basic IC plus, Switzerland) for the measurement of water-soluble  
9 ions. For the analysis of Lev (C<sub>6</sub>H<sub>10</sub>O<sub>5</sub>), Gal (C<sub>6</sub>H<sub>10</sub>O<sub>5</sub>), Man (C<sub>6</sub>H<sub>10</sub>O<sub>5</sub>) and SOA tracers, another  
10 round punch of filter (1 cm of diameter) was taken out. Then internal recovery standards  
11 (methyl-β-L-xylanopyranoside, m-XP and C24D50) were added to the filter and extracted with  
12 methanol 3 times for 10 min using ice-water ultrasonic agitation. Afterwards, the extract was  
13 reduced to 1 mL with a rotary evaporator, filtered and dried completely by a gentle nitrogen  
14 stream, added with a mixture of 40 μL of N,O-Bis(trimethylsilyl)trifluoroacetamide (BSTFA) plus  
15 1% trimethylsilyl chloride and pyridine in an oven at 70°C for 1 h. Finally, the solution was run on  
16 a gas chromatography–mass spectrometry (GC-MS) (Agilent 7890 GC and Agilent 5975 MS) with  
17 a capillary column (DB-5MS, 30 m, 0.25 mm, 0.25 μm). SOA tracers include  
18 cis-2-methyl-1,3,4-trihydroxy-1-butene (C<sub>5</sub>H<sub>10</sub>O<sub>3</sub>), 3-methyl-2,3,4-trihydroxy-1-butene (C<sub>5</sub>H<sub>10</sub>O<sub>3</sub>),  
19 trans-2-methyl-1,3,4-trihydroxy-1-butene (C<sub>5</sub>H<sub>10</sub>O<sub>3</sub>), 2-methylglyceric acid (C<sub>4</sub>H<sub>8</sub>O<sub>4</sub>),  
20 2-methylthreitol (C<sub>5</sub>H<sub>12</sub>O<sub>4</sub>), 2-methylerythritol (C<sub>5</sub>H<sub>12</sub>O<sub>4</sub>), 3-hydroxyglutaric acid (C<sub>5</sub>H<sub>8</sub>O<sub>5</sub>),  
21 pinonic acid (C<sub>10</sub>H<sub>16</sub>O<sub>3</sub>), β-caryophyllene acid (C<sub>14</sub>H<sub>22</sub>O<sub>4</sub>), 2,3-dihydroxy-4-oxopentanoic acid  
22 (C<sub>5</sub>H<sub>8</sub>O<sub>5</sub>).

## 23 **Isolation systems for WIOC and EC with regard to <sup>14</sup>C measurement**

24 Briefly, WIOC and EC are combusted in a stream of oxygen at 340 °C for 15 min and 650 °C for  
25 10 min, respectively. Prior to combustion at 650 °C, EC is placed in a tube furnace at 375 °C for 4  
26 hours.

Table SI Investigation of dynamics of WSOC desorption<sup>a</sup>

| Water Volume (ml) | WSOC ( $\mu\text{g C}$ ) |          |          |
|-------------------|--------------------------|----------|----------|
|                   | Sample A                 | Sample B | Sample C |
| 20                | 66.2                     | 222.4    | 507.8    |
| 50                | 71.8                     | 228.8    | 519.0    |
| 80                | 72.2                     | 232.1    | 527.0    |
| 100               | 72.8                     | 243.8    | 527.3    |
| 120               | 73.8                     | 245.0    | 527.2    |
| 12 h soaking      | 84.4                     | 242.8    | 517.6    |

<sup>a</sup>PM<sub>2.5</sub> concentrations are 38.0  $\mu\text{g}/\text{m}^3$ , 72.4  $\mu\text{g}/\text{m}^3$  and 157  $\mu\text{g}/\text{m}^3$  for sample A, B and C, respectively.

Table S2 Emission inventory of Man/Gal, Lev/Man and (OC/Lev)<sub>bb</sub> for different types of biomass burning

|              |                                    | Man/Gal         | Lev/Man            | OC/Lev             | References |
|--------------|------------------------------------|-----------------|--------------------|--------------------|------------|
| Hardwood     | Yellow Poplar                      | 5.01            | 10.67              | 6.40               | 1          |
|              | Mockernut Hickory                  | 1.82            | 24.73              | 6.28               | 1          |
|              | White Ash                          | ---             | ---                | 10.10              | 1          |
|              | Sweet-gum                          | ---             | ---                | 7.81               | 1          |
|              | Northern Red oak                   | 1.35            | 35.46              | 5.94               | 2          |
|              | Red Maple                          | ---             | ---                | 9.22               | 2          |
|              | Paper Birch                        | ---             | ---                | 9.13               | 2          |
|              | Forest Fire                        | 3.72            | 17.28              | 7.16               | 3          |
|              | Average                            | 2.98±1.47       | 22.04±9.21         | 7.76±1.47          |            |
| Softwood     | White pine                         | 6.98            | 5.81               | 19.23              | 2          |
|              | Hemlock                            | 10.34           | 3.73               | 10.48              | 2          |
|              | Balsam fir                         | 6.74            | 4.68               | 12.28              | 2          |
|              | Black Spruce                       | 2.40            | 4.20               | 12.69              | 4          |
|              | Wild fire                          | 2.23            | 5.60               | 16.13              | 5          |
|              |                                    | Average         | 5.74±3.07          | 4.80±0.80          | 14.16±3.12 |
| Annual Plant | 7 rice straws                      | 0.57(0.17-1.07) | 30.65(12.31-55.03) | 13.77(10.03-19.15) | 4          |
|              | Agricultural waste (United States) | 0.50            | 26.00              | 12.82              | 6          |
|              | Sawgrass savanna                   | 1.17            | 11.29              | 12.66              | 6          |
|              | Wheat                              | --              | --                 | 10.00              | 7          |
|              | Agricultural waste (East Asia)     | --              | --                 | 16.82              | 8          |
|              |                                    | Average         | 0.63±0.32          | 27.99±15.08        | 13.52±2.93 |
| Guangzhou    | Ambient aerosols                   | 2.19±0.33       | 17.85±4.25         |                    | This study |

Dashed line denotes no data reported

### Reference

1. Fine, P. M.; Cass, G. R.; & Simoneit, B. R., Chemical characterization of fine particle emissions from the fireplace combustion of woods grown in the southern United States. *Environmental Science & Technology* **2002**, *36*, 1442-1451.

2. Fine, P. M.; Cass, G. R.; & Simoneit, B. R., Chemical characterization of fine particle emissions from fireplace combustion of woods grown in the northeastern United States. *Environmental Science & Technology* **2001**, *35*, 2665-2675.
3. Zdráhal, Z.; Oliveira, J.; Vermeulen, R.; Claeys, M.; & Maenhaut, W., Improved method for quantifying levoglucosan and related monosaccharide anhydrides in atmospheric aerosols and application to samples from urban and tropical locations. *Environmental Science & Technology* **2002**, *36*, 747-753.
4. Sullivan, A. P.; Holden, A. S.; Patterson, L. A.; McMeeking, G. R.; Kreidenweis, S. M.; Malm, W. C.; Collett, Jr. J.L., A method for smoke marker measurements and its potential application for determining the contribution of biomass burning from wildfires and prescribed fires to ambient PM<sub>2.5</sub> organic carbon. *Journal of Geophysical Research: Atmospheres* **2008**, *113*, D22302.
5. Ward, T. J.; Hamilton Jr, R. F.; Dixon, R. W.; Paulsen, M.; Simpson, C. D., Characterization and evaluation of smoke tracers in PM: Results from the 2003 Montana wildfire season. *Atmospheric Environment* **2006**, *40*, 7005-7017.
6. Munchak, L. A.; Schichtel, B. A.; Sullivan, A. P.; Holden, A. S.; Kreidenweis, S. M.; Malm, W. C.; Collett Jr, J. L., Development of wildland fire particulate smoke marker to organic carbon emission ratios for the conterminous United States. *Atmospheric Environment* **2011**, *45*, 395-403.
7. Hays, M. D.; Fine, P. M.; Geron, C. D.; Kleeman, M. J.; Gullett, B. K., Open burning of agricultural biomass: physical and chemical properties of particle-phase emissions. *Atmospheric Environment* **2005**, *39*, 6747-6764.
8. Park, S. S.; Bae, M. S.; Schauer, J. J.; Kim, Y. J.; Yong Cho, S.; Jai Kim, S., Molecular composition of PM<sub>2.5</sub> organic aerosol measured at an urban site of Korea during the ACE-Asia campaign. *Atmospheric Environment* **2006**, *40*, 4182-4198.

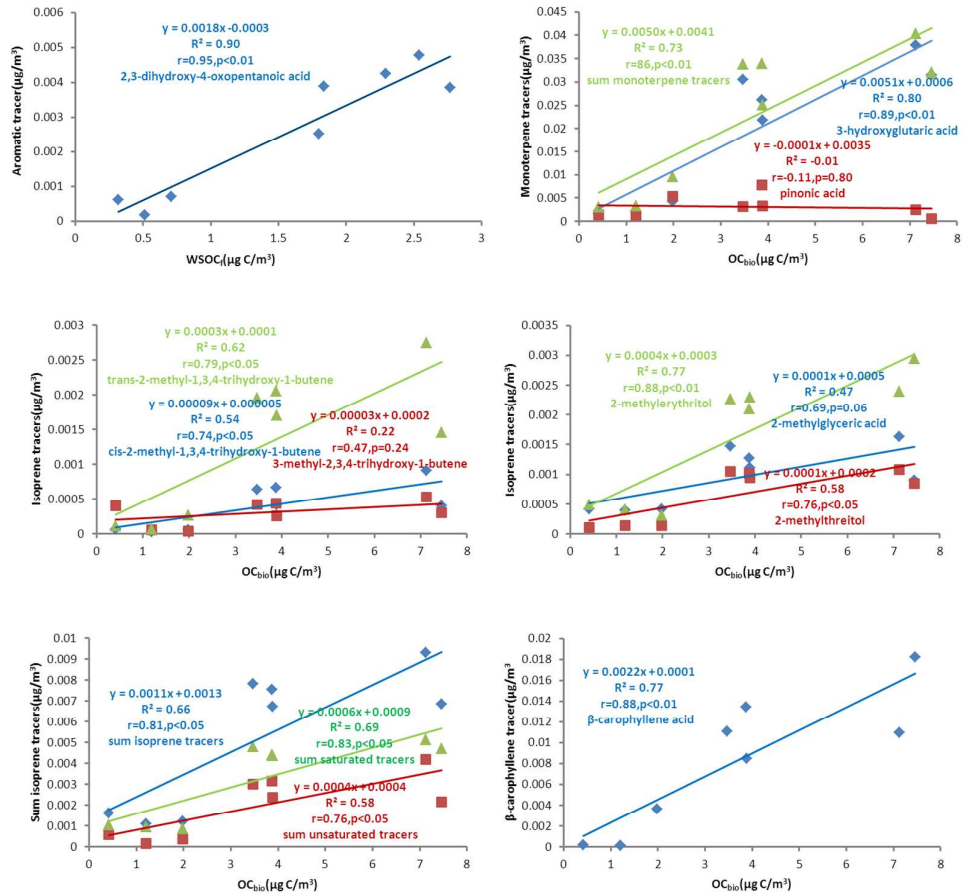

Figure S1 Correlations between SOA tracers and WSOC<sub>f</sub> and OC<sub>bio</sub>

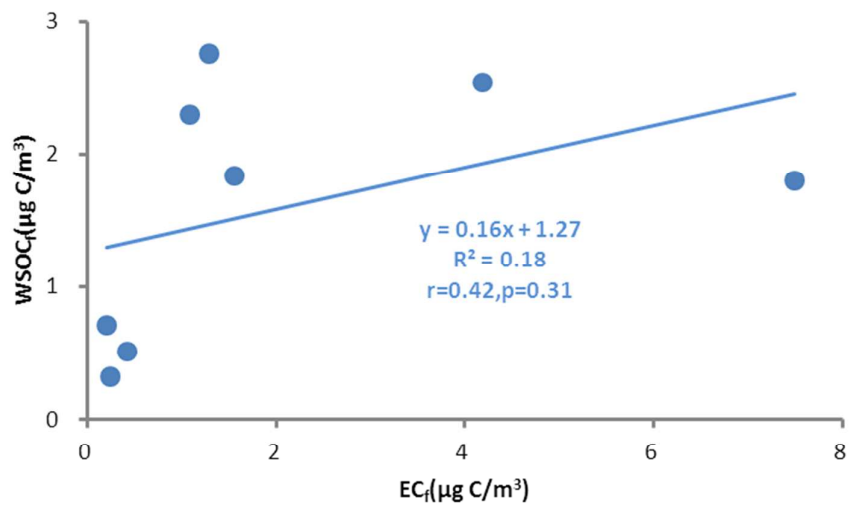

Figure S2 Correlation between  $WSOC_f$  and  $EC_f$
